# Supplementary material for: Mössbauer Synchrotron and X-ray Studies of Ultrathin YFeO3 Films
Source: MDPI journal article supplement (doi:10.3390/magnetism2040023), 2022-09-29
Supplement: s1 [file s1]

Supplementary material to the article

# Mössbauer Synchrotron and X-ray Studies of Ultrathin $\text{YFeO}_3$ Films

Marina Andreeva <sup>1,\*</sup>, Roman Baulin <sup>1</sup>, Aleksandr Nosov <sup>2</sup>, Igor Gribov <sup>2</sup>, Vladimir Izyurov <sup>2</sup>, Oleg Kondratev <sup>3</sup>, Ilia Subbotin <sup>3</sup>, Elkhan Pashaev <sup>3</sup>

<sup>1</sup> Faculty of Physics, Lomonosov Moscow State University, 119991 Moscow, Russia

<sup>2</sup> M.N. Mikheev Institute of Metal Physics RAS, 620108 Ekaterinburg, S. Kovalevskaya 18, Russia

<sup>3</sup> National Research Centre “Kurchatov Institute”, Pl. Kurchatova 1, 123182 Moscow, Russia

\* Correspondence: mandreeva1@yandex.ru

## 1. XRD powder diffraction

XRD powder diffraction patterns were calculated by VESTA software (Visualization for Electronic Structural Analysis) [1,2] using *CIF* (Crystallographic Interchange File) files for orthorhombic  $\text{YFeO}_3$  from the paper:[3], for hexagonal  $\text{YFeO}_3$  from [4] and for  $\text{Al}_2\text{O}_3$  from [5].

Notice that in this paper, the identification of reflections (*h k l*) is adopted for the case  $a < b < c$ , where *a, b, c* are the parameters of the crystal lattice.

### XRD pattern for the orthorhombic $\text{YFeO}_3$

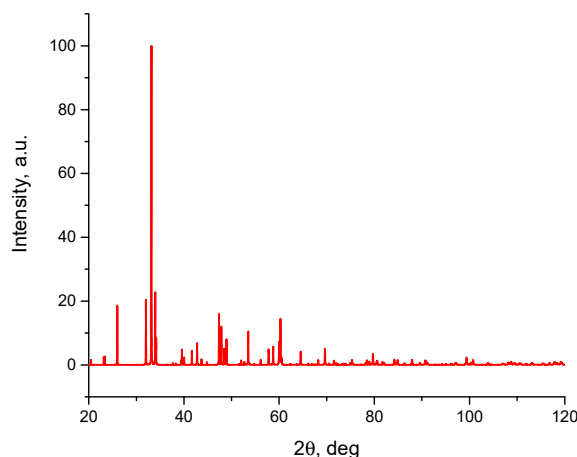

**Table S1.** Numerical data for reflections from orthorhombic  $\text{YFeO}_3$ . The highlighted lines mark the reflections observable for our epitaxial films in the used geometries.

| <b>h</b> | <b>k</b> | <b>l</b> | <b>d, Å</b> | <b>F<sub>real</sub></b> | <b>F<sub>imag</sub></b> | <b> F </b> | <b>2θ, deg</b> |
|----------|----------|----------|-------------|-------------------------|-------------------------|------------|----------------|
| 0        | 1        | 0        | 5.58770     | -                       | -                       | -          | 14.984         |
| 1        | 0        | 1        | 4.33217     | 15.7468                 | 0.90312                 | 15.7727    | 20.48426       |
| 1        | 1        | 0        | 3.8355      | 21.94806                | -5.53789                | 22.6359    | 23.17137       |
| 0        | 0        | 2        | 3.79755     | -34.73988               | 4.7597                  | 35.0644    | 23.40621       |
| 1        | 1        | 1        | 3.42371     | -53.21165               | -3.32456                | 53.3154    | 26.00446       |
| 0        | 2        | 0        | 2.79385     | 143.5066                | 17.86577                | 144.614    | 32.00883       |
| 1        | 1        | 2        | 2.69859     | -167.265                | -19.85184               | 168.439    | 33.17076       |
| 2        | 0        | 0        | 2.63715     | 166.04965               | 20.37891                | 167.296    | 33.96676       |

|   |   |   |         |            |           |         |          |
|---|---|---|---------|------------|-----------|---------|----------|
| 0 | 2 | 1 | 2.62208 | -71.8385   | -5.97269  | 72.0864 | 34.16801 |
| 1 | 2 | 0 | 2.46887 | -9.47027   | 0.57132   | 9.48749 | 36.3601  |
| 2 | 1 | 0 | 2.38488 | -21.74638  | 0.55643   | 21.7535 | 37.68783 |
| 1 | 2 | 1 | 2.34793 | -14.52858  | 0.45063   | 14.5356 | 38.30385 |
| 1 | 0 | 3 | 2.28238 | 35.49293   | -0.60942  | 35.4982 | 39.44891 |
| 2 | 1 | 1 | 2.27535 | 47.5836    | 1.77012   | 47.6165 | 39.57589 |
| 0 | 2 | 2 | 2.25043 | -47.74689  | 7.22929   | 48.2911 | 40.03266 |
| 2 | 0 | 2 | 2.16609 | -69.14248  | 4.7279    | 69.3039 | 41.6625  |
| 1 | 1 | 3 | 2.11291 | 63.44149   | 3.42967   | 63.5341 | 42.76177 |
| 1 | 2 | 2 | 2.06989 | -33.704    | -0.83807  | 33.7144 | 43.69575 |
| 2 | 1 | 2 | 2.01964 | -24.31607  | -0.83815  | 24.3305 | 44.84111 |
| 2 | 2 | 0 | 1.91775 | 162.27302  | 17.98853  | 163.267 | 47.36479 |
| 0 | 0 | 4 | 1.89878 | 201.31333  | 20.91512  | 202.397 | 47.86759 |
| 0 | 2 | 3 | 1.87603 | 95.13238   | 6.17174   | 95.3324 | 48.4849  |
| 2 | 2 | 1 | 1.85939 | -85.53697  | -5.96824  | 85.7449 | 48.94706 |
| 1 | 2 | 3 | 1.76755 | -20.20219  | -0.67786  | 20.2136 | 51.67234 |
| 1 | 3 | 0 | 1.75627 | -55.03638  | -10.67637 | 56.0624 | 52.02883 |
| 2 | 1 | 3 | 1.73595 | -31.25658  | -1.69993  | 31.3028 | 52.68443 |
| 3 | 0 | 1 | 1.71281 | 14.80521   | 2.50573   | 15.0158 | 53.45228 |
| 2 | 2 | 2 | 1.71185 | 7.88459    | 7.71557   | 11.0316 | 53.48453 |
| 1 | 3 | 1 | 1.71112 | -112.22096 | -7.75244  | 112.488 | 53.50927 |
| 1 | 1 | 4 | 1.70167 | 20.62239   | -5.56408  | 21.3598 | 53.83034 |
| 3 | 1 | 0 | 1.67705 | 25.71475   | -5.85441  | 26.3728 | 54.68609 |
| 3 | 1 | 1 | 1.6376  | -48.42781  | -3.22136  | 48.5348 | 56.11804 |
| 1 | 3 | 2 | 1.59406 | -86.76128  | -14.90429 | 88.0321 | 57.79322 |
| 0 | 2 | 4 | 1.57042 | 136.32656  | 18.03533  | 137.514 | 58.74736 |
| 2 | 0 | 4 | 1.54091 | 156.93517  | 20.54276  | 158.274 | 59.98623 |
| 3 | 1 | 2 | 1.53411 | -159.33826 | -19.72344 | 160.554 | 60.27964 |
| 2 | 2 | 3 | 1.52868 | 60.49871   | 5.81943   | 60.778  | 60.51608 |
| 2 | 3 | 0 | 1.52137 | 21.78075   | 1.72439   | 21.8489 | 60.83763 |
| 1 | 2 | 4 | 1.50512 | 10.51037   | 0.70111   | 10.5337 | 61.56554 |
| 2 | 3 | 1 | 1.49174 | 10.89876   | 0.53461   | 10.9119 | 62.17879 |
| 3 | 2 | 0 | 1.488   | 39.78686   | 2.14608   | 39.8447 | 62.3525  |
| 2 | 1 | 4 | 1.48547 | 2.99505    | 0.6935    | 3.0743  | 62.47086 |
| 3 | 2 | 1 | 1.46024 | 13.7692    | 1.666     | 13.8696 | 63.67525 |
| 1 | 0 | 5 | 1.45969 | 28.25161   | 1.05391   | 28.2713 | 63.70214 |
| 3 | 0 | 3 | 1.44406 | -31.55837  | -2.65117  | 31.6695 | 64.47434 |
| 1 | 3 | 3 | 1.44304 | 96.39345   | 7.69491   | 96.7001 | 64.52509 |
| 1 | 1 | 5 | 1.41229 | -33.68721  | -3.27059  | 33.8456 | 66.10703 |
| 2 | 3 | 2 | 1.41226 | -4.19987   | -1.57018  | 4.48379 | 66.10901 |
| 3 | 1 | 3 | 1.39812 | 16.07461   | 2.95909   | 16.3447 | 66.86451 |
| 0 | 4 | 0 | 1.39693 | 53.41014   | 11.62788  | 54.6612 | 66.92937 |
| 3 | 2 | 2 | 1.38544 | -23.74422  | -2.01397  | 23.8295 | 67.55836 |
| 0 | 4 | 1 | 1.37388 | -92.30054  | -7.91553  | 92.6393 | 68.20459 |
| 1 | 4 | 0 | 1.35037 | 42.03329   | 1.19496   | 42.0503 | 69.56124 |
| 2 | 2 | 4 | 1.3493  | 118.08534  | 17.86176  | 119.429 | 69.6243  |
| 0 | 2 | 5 | 1.33452 | -48.85827  | -5.87049  | 49.2097 | 70.5087  |
| 1 | 4 | 1 | 1.32952 | -4.44587   | -0.16428  | 4.4489  | 70.81412 |
| 4 | 0 | 0 | 1.31858 | 127.84605  | 19.86058  | 129.38  | 71.49137 |
| 0 | 4 | 2 | 1.31104 | 63.38937   | 13.90452  | 64.8964 | 71.96625 |
| 2 | 3 | 3 | 1.30403 | -27.70231  | -0.71341  | 27.7115 | 72.41398 |

|   |   |   |         |            |           |         |          |
|---|---|---|---------|------------|-----------|---------|----------|
| 1 | 2 | 5 | 1.29375 | -18.28985  | 0.33395   | 18.2929 | 73.08192 |
| 1 | 3 | 4 | 1.28931 | -34.67303  | -10.60966 | 36.2599 | 73.37472 |
| 4 | 1 | 0 | 1.28333 | 39.1528    | 1.68652   | 39.1891 | 73.77327 |
| 3 | 2 | 3 | 1.28283 | -2.37875   | -1.55347  | 2.84108 | 73.80653 |
| 2 | 1 | 5 | 1.28121 | 36.12789   | 1.80616   | 36.173  | 73.91574 |
| 3 | 3 | 0 | 1.2785  | -3.96596   | -10.39621 | 11.127  | 74.09825 |
| 1 | 4 | 2 | 1.27232 | 0.38693    | -0.78219  | 0.87266 | 74.51907 |
| 0 | 0 | 6 | 1.26585 | -66.30089  | 4.42802   | 66.4486 | 74.96529 |
| 4 | 1 | 1 | 1.26539 | 37.61912   | 3.18857   | 37.754  | 74.99716 |
| 3 | 3 | 1 | 1.26076 | -74.87497  | -7.19871  | 75.2202 | 75.32023 |
| 3 | 1 | 4 | 1.25697 | 32.32245   | -5.78907  | 32.8368 | 75.58745 |
| 4 | 0 | 2 | 1.24563 | -17.96749  | 5.63605   | 18.8307 | 76.399   |
| 2 | 4 | 0 | 1.23443 | 34.21645   | 11.51329  | 36.1015 | 77.21887 |
| 0 | 4 | 3 | 1.22309 | 58.4162    | 7.60751   | 58.9095 | 78.07    |
| 2 | 4 | 1 | 1.21845 | -78.60102  | -7.65025  | 78.9724 | 78.42472 |
| 4 | 1 | 2 | 1.21578 | 1.51215    | -1.2653   | 1.9717  | 78.62962 |
| 3 | 3 | 2 | 1.21168 | -63.0231   | -14.70523 | 64.716  | 78.94798 |
| 1 | 1 | 6 | 1.20208 | -122.03176 | -19.89148 | 123.642 | 79.70385 |
| 4 | 2 | 0 | 1.19244 | 88.88002   | 17.30218  | 90.5485 | 80.47872 |
| 1 | 4 | 3 | 1.19147 | 9.25481    | 0.22221   | 9.25748 | 80.55754 |
| 2 | 2 | 5 | 1.19074 | -75.26483  | -6.04465  | 75.5072 | 80.61745 |
| 2 | 3 | 4 | 1.18727 | 12.4294    | 1.64936   | 12.5384 | 80.90148 |
| 4 | 2 | 1 | 1.17801 | -64.71802  | -5.53458  | 64.9542 | 81.67189 |
| 2 | 4 | 2 | 1.17397 | 57.08486   | 13.86384  | 58.7443 | 82.01355 |
| 3 | 2 | 4 | 1.17121 | 27.7845    | 2.0818    | 27.8624 | 82.2485  |
| 0 | 2 | 6 | 1.15302 | -10.26404  | 7.48591   | 12.7039 | 83.83624 |
| 3 | 0 | 5 | 1.14942 | 9.05474    | 2.43105   | 9.37541 | 84.15939 |
| 1 | 3 | 5 | 1.1489  | -92.85344  | -7.78198  | 93.179  | 84.20542 |
| 4 | 1 | 3 | 1.14467 | -44.62872  | -3.29352  | 44.7501 | 84.58954 |
| 3 | 3 | 3 | 1.14124 | 83.75606   | 7.34228   | 84.0773 | 84.90315 |
| 2 | 0 | 6 | 1.14119 | -31.02746  | 4.97587   | 31.4239 | 84.90738 |
| 4 | 2 | 2 | 1.13767 | 3.21157    | 8.1003    | 8.71373 | 85.23176 |
| 1 | 2 | 6 | 1.12642 | -3.74417   | -0.64164  | 3.79875 | 86.28974 |
| 3 | 1 | 5 | 1.12584 | -50.28565  | -3.35602  | 50.3975 | 86.34474 |
| 0 | 4 | 4 | 1.12522 | 39.49589   | 11.58466  | 41.1598 | 86.40452 |
| 2 | 1 | 6 | 1.11811 | 1.86721    | -0.6307   | 1.97085 | 87.09056 |
| 2 | 4 | 3 | 1.10956 | 94.28223   | 7.88053   | 94.611  | 87.93241 |
| 1 | 4 | 4 | 1.10045 | 17.92805   | 0.99413   | 17.9556 | 88.85101 |
| 3 | 4 | 0 | 1.09371 | 25.87366   | 2.60606   | 26.0046 | 89.54566 |
| 1 | 5 | 0 | 1.09327 | -86.20961  | -17.05099 | 87.8797 | 89.59146 |
| 4 | 0 | 4 | 1.08304 | 110.81863  | 19.83476  | 112.58  | 90.67074 |
| 3 | 4 | 1 | 1.08254 | -9.79265   | -0.47091  | 9.80396 | 90.72438 |
| 1 | 5 | 1 | 1.08211 | -77.74898  | -6.75986  | 78.0423 | 90.77018 |
| 4 | 2 | 3 | 1.07877 | 63.34246   | 5.55804   | 63.5858 | 91.13081 |
| 4 | 3 | 0 | 1.07619 | 21.98663   | 3.19531   | 22.2176 | 91.41123 |
| 2 | 3 | 5 | 1.07494 | 1.10073    | 0.44281   | 1.18646 | 91.54812 |
| 4 | 3 | 1 | 1.06555 | 18.73262   | 1.07118   | 18.7632 | 92.59067 |
| 4 | 1 | 4 | 1.06326 | 16.99359   | 1.48158   | 17.0581 | 92.84962 |
| 3 | 2 | 5 | 1.06297 | 17.29963   | 1.72378   | 17.3853 | 92.8816  |
| 1 | 0 | 7 | 1.06276 | 8.64686    | -0.67489  | 8.67316 | 92.90573 |
| 3 | 3 | 4 | 1.06051 | -16.03467  | -10.56267 | 19.2011 | 93.16234 |

|   |   |   |         |            |           |         |           |
|---|---|---|---------|------------|-----------|---------|-----------|
| 2 | 2 | 6 | 1.05646 | -17.25126  | 7.52371   | 18.8205 | 93.62739  |
| 3 | 4 | 2 | 1.05099 | -41.37631  | -2.81048  | 41.4717 | 94.26438  |
| 1 | 5 | 2 | 1.0506  | 9.90429    | -8.23423  | 12.8801 | 94.31031  |
| 5 | 0 | 1 | 1.04483 | 45.50776   | 4.30183   | 45.7106 | 94.99452  |
| 1 | 1 | 7 | 1.04404 | 40.12214   | 3.40623   | 40.2665 | 95.0889   |
| 5 | 1 | 0 | 1.03655 | 36.09459   | -6.35012  | 36.6489 | 95.99817  |
| 4 | 3 | 2 | 1.03542 | -39.56776  | -3.4259   | 39.7158 | 96.1376   |
| 2 | 4 | 4 | 1.03495 | 30.9642    | 11.54561  | 33.0467 | 96.19579  |
| 2 | 5 | 0 | 1.02896 | 7.95206    | 1.40119   | 8.07457 | 96.94106  |
| 0 | 4 | 5 | 1.02823 | -91.3544   | -8.07368  | 91.7105 | 97.03278  |
| 5 | 1 | 1 | 1.02703 | -20.28853  | -2.72302  | 20.4705 | 97.18473  |
| 1 | 3 | 6 | 1.02691 | -55.77732  | -14.80332 | 57.7083 | 97.19988  |
| 2 | 5 | 1 | 1.01965 | -2.47685   | -0.88665  | 2.63077 | 98.13005  |
| 0 | 2 | 7 | 1.01142 | 64.16724   | 6.12737   | 64.4591 | 99.21078  |
| 3 | 1 | 6 | 1.01034 | -112.33736 | -19.62454 | 114.039 | 99.35436  |
| 4 | 2 | 4 | 1.00982 | 80.76755   | 17.32216  | 82.6042 | 99.42404  |
| 1 | 4 | 5 | 1.00923 | -1.23809   | -0.13453  | 1.24537 | 99.50285  |
| 3 | 4 | 3 | 1.00402 | 7.03384    | 0.44222   | 7.04773 | 100.20783 |
| 1 | 5 | 3 | 1.00368 | 72.98294   | 6.74379   | 73.2939 | 100.25437 |
| 5 | 1 | 2 | 0.99997 | -106.92534 | -18.94645 | 108.591 | 100.76523 |
| 1 | 2 | 7 | 0.99332 | -8.80668   | -0.6272   | 8.82899 | 101.69644 |
| 2 | 5 | 2 | 0.99315 | -4.73139   | -1.35811  | 4.92245 | 101.72044 |
| 4 | 3 | 3 | 0.99042 | 2.02332    | -0.80383  | 2.17715 | 102.10929 |
| 2 | 1 | 7 | 0.98761 | -22.61353  | -1.71558  | 22.6785 | 102.5141  |
| 5 | 2 | 0 | 0.98686 | 33.73357   | 3.26872   | 33.8916 | 102.62224 |
| 4 | 1 | 5 | 0.98031 | 28.56289   | 3.13469   | 28.7344 | 103.58359 |
| 5 | 2 | 1 | 0.97864 | 31.43283   | 2.84268   | 31.5611 | 103.83308 |
| 3 | 3 | 5 | 0.97815 | -60.56848  | -7.12499  | 60.9861 | 103.90508 |
| 5 | 0 | 3 | 0.97372 | -49.13712  | -4.37806  | 49.3318 | 104.57442 |
| 2 | 3 | 6 | 0.97307 | -14.18198  | -1.68374  | 14.2816 | 104.67345 |
| 3 | 2 | 6 | 0.96417 | -26.49207  | -2.11125  | 26.5761 | 106.05532 |
| 5 | 1 | 3 | 0.95926 | 40.18256   | 3.01006   | 40.2951 | 106.83675 |
| 4 | 4 | 0 | 0.95888 | 24.52162   | 11.56981  | 27.114  | 106.89909 |
| 2 | 4 | 5 | 0.95799 | -61.05666  | -7.53202  | 61.5195 | 107.04216 |
| 5 | 2 | 2 | 0.95514 | -28.15335  | -3.19949  | 28.3346 | 107.50629 |
| 2 | 5 | 3 | 0.95324 | 17.20628   | 1.09313   | 17.241  | 107.81817 |
| 4 | 4 | 1 | 0.95132 | -77.29003  | -7.25601  | 77.6299 | 108.13513 |
| 0 | 0 | 8 | 0.94939 | 108.67518  | 20.6323   | 110.616 | 108.45833 |
| 3 | 4 | 4 | 0.94773 | 30.91555   | 2.70552   | 31.0337 | 108.73696 |
| 1 | 5 | 4 | 0.94744 | -82.75015  | -17.12803 | 84.5042 | 108.78534 |
| 2 | 2 | 7 | 0.94435 | 51.54204   | 5.8526    | 51.8733 | 109.31158 |
| 3 | 5 | 0 | 0.94313 | -93.37118  | -17.09344 | 94.9229 | 109.52061 |
| 0 | 4 | 6 | 0.93802 | 43.49338   | 13.83909  | 45.642  | 110.40968 |
| 4 | 2 | 5 | 0.93796 | -55.53652  | -5.52253  | 55.8104 | 110.41937 |
| 4 | 3 | 4 | 0.93626 | 28.82984   | 3.30751   | 29.0189 | 110.71881 |
| 3 | 5 | 1 | 0.93594 | -55.97446  | -6.25503  | 56.3229 | 110.77616 |
| 0 | 6 | 0 | 0.93128 | -18.1727   | 6.0399    | 19.1501 | 111.61097 |
| 4 | 4 | 2 | 0.9297  | 53.43123   | 13.88422  | 55.2057 | 111.89924 |
| 0 | 6 | 1 | 0.92436 | -26.39808  | -4.04177  | 26.7057 | 112.8845  |
| 1 | 4 | 6 | 0.92353 | -21.86681  | -1.08615  | 21.8938 | 113.04101 |
| 3 | 0 | 7 | 0.92333 | -22.62333  | -2.61875  | 22.7744 | 113.07708 |

## XRD pattern for the hexagonal YFeO<sub>3</sub>

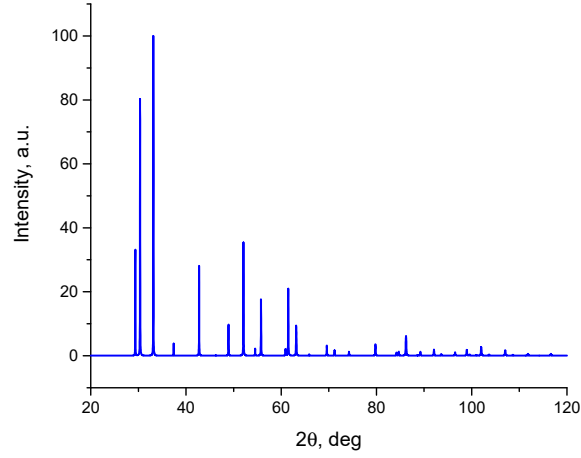

**Table S2.** Numerical data for reflections from hexagonal YFeO<sub>3</sub>. The highlighted lines mark the reflections observable for our epitaxial films in the used geometries.

| <b>h</b> | <b>k</b> | <b>l</b> | <b>D</b> | <b>F(real)</b> | <b>F(imag)</b> | <b> F </b> | <b>2θ</b> |
|----------|----------|----------|----------|----------------|----------------|------------|-----------|
| 0        | 0        | -1       | 11.759   | 0              | 0              | 0          | 7.51192   |
| 0        | 0        | 1        | 11.759   | 0              | 0              | 0          | 7.51192   |
| 0        | 0        | 2        | 5.8795   | 24.48098       | -2.41352       | 24.5997    | 15.05638  |
| 1        | 1        | 0        | 3.03966  | 42.46843       | 0.82088        | 42.4764    | 29.35939  |
| 1        | 0        | 1        | 2.94293  | -43.77209      | -5.40336       | 44.1043    | 30.34724  |
| 0        | 0        | 4        | 2.93975  | 97.26827       | 9.99803        | 97.7808    | 30.38085  |
| 1        | 0        | 2        | 2.70016  | 61.32862       | 6.82651        | 61.7074    | 33.151    |
| 1        | 0        | 3        | 2.40203  | 13.27334       | 5.2224         | 14.2638    | 37.40887  |
| 1        | 0        | 4        | 2.11316  | 47.79589       | 0.62412        | 47.8       | 42.7566   |
| 0        | 0        | 6        | 1.95983  | -9.77284       | -3.0503        | 10.2378    | 46.28781  |
| 1        | 0        | 5        | 1.86006  | -34.12666      | -5.32415       | 34.5395    | 48.92827  |
| 1        | 1        | 0        | 1.75495  | 102.39196      | 9.7291         | 102.853    | 52.07099  |
| 1        | 1        | 2        | 1.68164  | 19.63952       | -2.17799       | 19.7599    | 54.52446  |
| 1        | 0        | 6        | 1.64715  | 57.48018       | 6.2842         | 57.8227    | 55.76435  |
| 2        | 2        | 0        | 1.51983  | 31.77729       | 0.78375        | 31.787     | 60.90584  |
| 2        | 0        | 1        | 1.50729  | 28.19212       | 4.9604         | 28.6252    | 61.46706  |
| 1        | 1        | 4        | 1.50687  | 68.48864       | 9.20432        | 69.1044    | 61.48639  |
| 2        | 0        | 2        | 1.47146  | 47.39916       | 6.30252        | 47.8163    | 63.13326  |
| 1        | 0        | 7        | 1.47027  | 28.10942       | 5.2467         | 28.5949    | 63.19037  |
| 0        | 0        | 8        | 1.46988  | 62.36821       | 9.01529        | 63.0164    | 63.2094   |
| 2        | 0        | 3        | 1.41704  | -11.04268      | -4.79416       | 12.0385    | 65.85763  |
| 2        | 0        | 4        | 1.35008  | 35.11703       | 0.60091        | 35.1222    | 69.57818  |
| 1        | 0        | 8        | 1.32328  | 26.57498       | -0.10377       | 26.5752    | 71.19837  |
| 1        | 1        | 6        | 1.30739  | -1.64286       | -2.76832       | 3.2191     | 72.19846  |
| 2        | 0        | 5        | 1.27648  | 23.77082       | 4.88769        | 24.2681    | 74.23526  |
| 2        | 0        | 6        | 1.20101  | 44.71277       | 5.79914        | 45.0873    | 79.78849  |
| 1        | 0        | 9        | 1.20036  | -13.17124      | -5.04045       | 14.1028    | 79.84026  |
| 0        | 0        | 10       | 1.1759   | 4.42521        | -3.59919       | 5.70409    | 81.84987  |
| 2        | 1        | 0        | 1.14888  | 26.22867       | 0.74776        | 26.2393    | 84.20722  |
| 2        | 1        | 1        | 1.14344  | -20.46204      | -4.55815       | 20.9636    | 84.70126  |

|   |   |    |         |           |          |            |           |
|---|---|----|---------|-----------|----------|------------|-----------|
| 2 | 1 | 2  | 1.12756 | 38.75309  | 5.82356  | 39.1882    | 86.18118  |
| 2 | 0 | 7  | 1.12702 | -20.54429 | -4.81658 | 21.1014    | 86.23225  |
| 1 | 1 | 8  | 1.12684 | 48.39326  | 8.2964   | 49.0993    | 86.24927  |
| 2 | 1 | 3  | 1.1025  | 8.74599   | 4.40528  | 9.7928     | 88.64254  |
| 1 | 0 | 10 | 1.0967  | 31.14445  | 5.21212  | 31.5776    | 89.23629  |
| 2 | 1 | 4  | 1.07007 | 28.52433  | 0.57773  | 28.5302    | 92.08524  |
| 2 | 0 | 8  | 1.05658 | 21.83575  | -0.07318 | 21.8359    | 93.61333  |
| 2 | 1 | 5  | 1.03229 | 22.17621  | 2.84745  | 22.3583    | 96.52445  |
| 3 | 0 | 0  | 1.01322 | 59.07386  | 8.26882  | 59.6498    | 98.97166  |
| 3 | 0 | 1  | 1.00948 | -1E-6     | 0        | 9.4362E-7  | 99.46983  |
| 1 | 0 | 11 | 1.00845 | 18.40595  | 5.02387  | 19.0793    | 99.60762  |
| 3 | 0 | 2  | 0.9985  | 16.07999  | -1.7784  | 16.178     | 100.96885 |
| 2 | 1 | 6  | 0.99114 | 36.63421  | 5.35601  | 37.0237    | 102.00709 |
| 3 | 0 | 3  | 0.98098 | 0         | 0        | 9.0604E-15 | 103.48477 |
| 0 | 0 | 12 | 0.97992 | 43.42571  | 7.8553   | 44.1305    | 103.64203 |
| 1 | 1 | 10 | 0.97688 | 5.20134   | -3.28094 | 6.14967    | 104.09604 |

**XRD pattern for the Al<sub>2</sub>O<sub>3</sub> (Sapphire).**

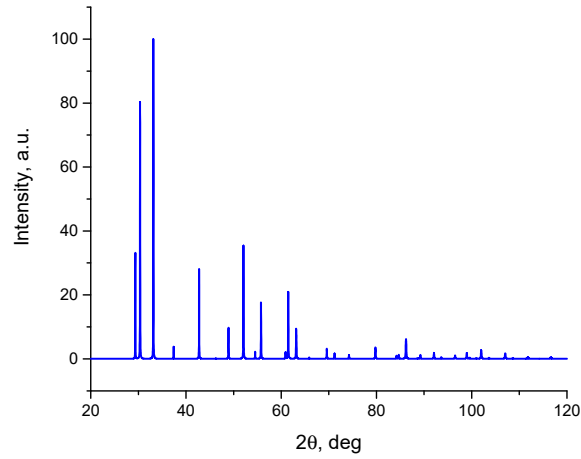

**Table S3.** Numerical data for reflections from Al<sub>2</sub>O<sub>3</sub> (Sapphire). The highlighted lines mark the reflections observable for our *r*-Al<sub>2</sub>O<sub>3</sub> substrate in the used geometries.

| <b>h</b> | <b>k</b> | <b>l</b> | <b>d, Å</b> | <b>F<sub>real</sub></b> | <b>F<sub>imag</sub></b> | <b> F </b> | <b>2θ, deg</b> |
|----------|----------|----------|-------------|-------------------------|-------------------------|------------|----------------|
| -1       | 0        | 2        | 3,47813     | -47,76522               | -0,89898                | 47,7737    | 25,5906        |
| 1        | 0        | 4        | 2,55017     | -84,18907               | -2,40899                | 84,2235    | 35,1624        |
| 1        | 1        | 0        | 2,3777      | 62,62173                | 2,66746                 | 62,6785    | 37,80601       |
| 0        | 0        | 6        | 2,16517     | -11,19556               | 1,66989                 | 11,3194    | 41,68101       |
| 1        | 1        | 3        | 2,08419     | 75,96208                | 0,48577                 | 75,9636    | 43,38076       |
| 2        | 0        | 2        | 1,96288     | -14,53728               | -0,73991                | 14,5561    | 46,21183       |
| -2       | 0        | 4        | 1,73907     | -96,05282               | -2,56806                | 96,0871    | 52,58284       |
| 1        | 1        | 6        | 1,60088     | 107,29859               | 2,52617                 | 107,328    | 57,52379       |
| 2        | 1        | 1        | 1,54552     | -17,86554               | -0,14922                | 17,8662    | 59,78939       |
| 1        | 2        | 2        | 1,51371     | -21,21051               | -0,79501                | 21,2254    | 61,17834       |
| 0        | 1        | 8        | 1,51068     | 44,29455                | 1,24637                 | 44,3121    | 61,31452       |
| 2        | 1        | 4        | 1,40368     | -79,7776                | -2,51295                | 79,8172    | 66,56525       |
| 3        | 0        | 0        | 1,37277     | 144,17299               | 3,47488                 | 144,215    | 68,2676        |

|    |   |    |         |           |          |         |           |
|----|---|----|---------|-----------|----------|---------|-----------|
| 1  | 2 | 5  | 1,33528 | -15,29066 | -0,14922 | 15,2914 | 70,46278  |
| 2  | 0 | 8  | 1,27508 | 24,39986  | 1,08731  | 24,4241 | 74,33027  |
| 1  | 0 | 10 | 1,23892 | -88,13153 | -2,98267 | 88,182  | 76,88774  |
| 1  | 1 | 9  | 1,23388 | -45,58566 | -0,48577 | 45,5882 | 77,26027  |
| 2  | 1 | 7  | 1,19262 | 13,47779  | 0,14922  | 13,4786 | 80,46453  |
| 2  | 2 | 0  | 1,18885 | 57,37006  | 2,68439  | 57,4328 | 80,77204  |
| -3 | 0 | 6  | 1,15938 | 14,48348  | 1,71876  | 14,5851 | 83,27346  |
| 3  | 0 | 6  | 1,15938 | 14,48348  | 1,71876  | 14,5851 | 83,27346  |
| 2  | 2 | 3  | 1,14643 | -38,01213 | -0,43993 | 38,0147 | 84,42909  |
| 1  | 3 | 1  | 1,13782 | 8,85743   | 0,10338  | 8,85804 | 85,21819  |
| 3  | 1 | 2  | 1,12495 | -33,28723 | -0,97101 | 33,3014 | 86,43009  |
| 1  | 2 | 8  | 1,1237  | 27,55919  | 1,14241  | 27,5829 | 86,54971  |
| 0  | 2 | 10 | 1,09872 | -67,66345 | -2,82361 | 67,7223 | 89,02876  |
| 0  | 0 | 12 | 1,08258 | 59,0643   | 1,05617  | 59,0737 | 90,71997  |
| 1  | 3 | 4  | 1,07752 | -52,53927 | -2,33696 | 52,5912 | 91,26715  |
| 3  | 1 | 5  | 1,04563 | 8,06652   | 0,10338  | 8,06718 | 94,899    |
| 2  | 2 | 6  | 1,04209 | 76,32079  | 2,50925  | 76,362  | 95,32347  |
| 0  | 4 | 2  | 1,01688 | -39,55255 | -1,0919  | 39,5676 | 98,49036  |
| 2  | 1 | 10 | 0,99738 | -66,74666 | -2,87871 | 66,8087 | 101,12551 |
| 1  | 1 | 12 | 0,98526 | -9,08994  | 0,19989  | 9,09213 | 102,85443 |
| 4  | 0 | 4  | 0,98144 | -39,93773 | -2,21607 | 39,9992 | 103,41623 |
| 1  | 3 | 7  | 0,97274 | -7,4676   | -0,10338 | 7,46832 | 104,72384 |
| 3  | 2 | 1  | 0,94231 | 12,6515   | 0,18097  | 12,6528 | 109,66117 |
| 1  | 2 | 11 | 0,94085 | 10,415    | 0,14922  | 10,4161 | 109,91493 |
| 2  | 3 | 2  | 0,93496 | -7,39243  | -0,67308 | 7,42301 | 110,94995 |
| 3  | 1 | 8  | 0,93425 | 35,87141  | 1,3184   | 35,8956 | 111,07784 |
| 2  | 2 | 9  | 0,91767 | 29,94693  | 0,43993  | 29,9502 | 114,15492 |
| 3  | 2 | 4  | 0,90719 | -65,31769 | -2,63489 | 65,3708 | 116,22726 |
| 0  | 1 | 14 | 0,90523 | 53,9922   | 2,59133  | 54,0543 | 116,62722 |
| 4  | 1 | 0  | 0,89869 | 50,54978  | 2,9053   | 50,6332 | 117,99308 |
| 2  | 3 | 5  | 0,88792 | 11,92896  | 0,18097  | 11,9303 | 120,34583 |
| 4  | 1 | 3  | 0,87994 | 30,77571  | -4,99309 | 31,1781 | 122,1847  |
| 1  | 4 | 3  | 0,87994 | 26,67412  | 0,40818  | 26,6772 | 122,1847  |
| -4 | 0 | 8  | 0,86953 | 41,18973  | 1,43929  | 41,2149 | 124,71852 |
| 1  | 3 | 10 | 0,8578  | -68,81153 | -3,0547  | 68,8793 | 127,79059 |

## 2. Diffraction curves for epitaxial film/substrate case

It is incorrect to use powder diffraction patterns for epitaxial films. Therefore, the diffraction curves for the film/substrate case were calculated based on the dynamic theory of X-ray diffraction. The calculation algorithm is based on the paper [6].

The calculations of the XRD patterns for epitaxial  $\text{YFeO}_3/r\text{-Al}_2\text{O}_3$  films have been performed for the three models. The crystal lattice parameters are taken from the corresponding CIF files. The results are shown below.

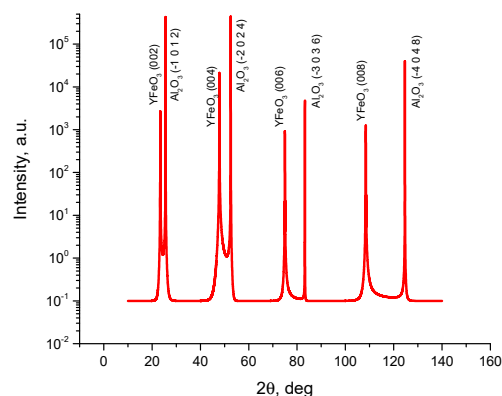

**Figure S1.** 100 nm layer of (001) orthorhombic YFeO<sub>3</sub> on *r*-Al<sub>2</sub>O<sub>3</sub>.

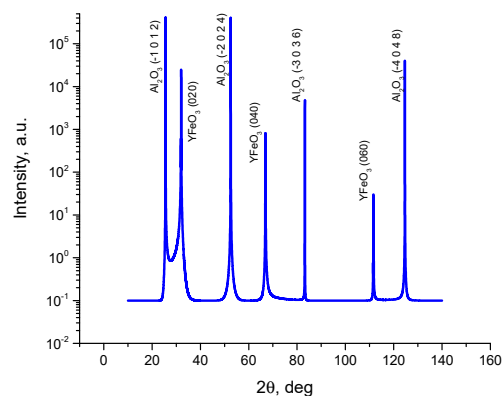

**Figure S2.** 100 nm layer of (010) orthorhombic YFeO<sub>3</sub> on *r*-Al<sub>2</sub>O<sub>3</sub>.

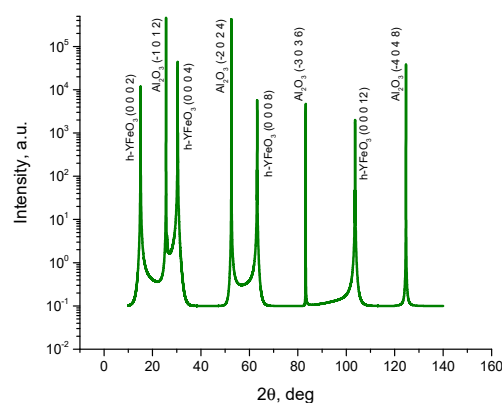

**Figure S3.** 100 nm layer of hexagonal (0 0 0 1) YFeO<sub>3</sub> on *r*-Al<sub>2</sub>O<sub>3</sub>.

## References

1. Momma, K., Izumi, F. VESTA 3 for three-dimensional visualization of crystal, volumetric and morphology data. *J. Appl. Crystallogr.* **2011**, *44*, 1272-1276.
2. <https://www.ch.cam.ac.uk/computing/software/vesta>
3. Du Boulay, D., Maslen, E. N., Streltsov, V. A., Ishizawa, N. A synchrotron X-ray study of the electron density in YFeO<sub>3</sub>. *Acta Crystallographica Section B: Structural Science* **1995**, *51*(6) 921-929.
4. Wang, M., Wang, T., Song, S., Tan, M. Structure-Controllable Synthesis of Multiferroic YFeO<sub>3</sub> Nanopowders and Their Optical and Magnetic Properties. *Materials* **2017**, *10*(6), 626.



5. Wang, X.-L., Hubbard, C. R., Alexander, K. B., Becher, P. F., Fernandez-Baca, J. A., Spooner, S. Neutron Diffraction Measurements of the Residual Stresses in  $\text{Al}_2\text{O}_3\text{-ZrO}_2$  ( $\text{CeO}_2$ ) Ceramic Composites. *Journal of the American Ceramic Society* **1994**, 77(6), 1569-1575.
6. Wie C. R., Tombrello T. A., Vreeland Jr T. Dynamical x-ray diffraction from nonuniform crystalline films: Application to x-ray rocking curve analysis. *Journal of Applied Physics* **1986**, 59(11), 3743-3746.
